# Supplementary material for: New Ankylosaurian Cranial Remains From the Lower Cretaceous (Upper Albian) Toolebuc Formation of Queensland, Australia
Source: Frontiers journal article supplement (doi:10.3389/feart.2022.803505), 2022-03-28
Supplement: Data_Sheet_1.ZIP [file Data_Sheet_1.ZIP]

Supplementary Material S.3 Figure S1- Bootstrap values produced from Arbour and Currie (2016) matrix including SAMA P405346.
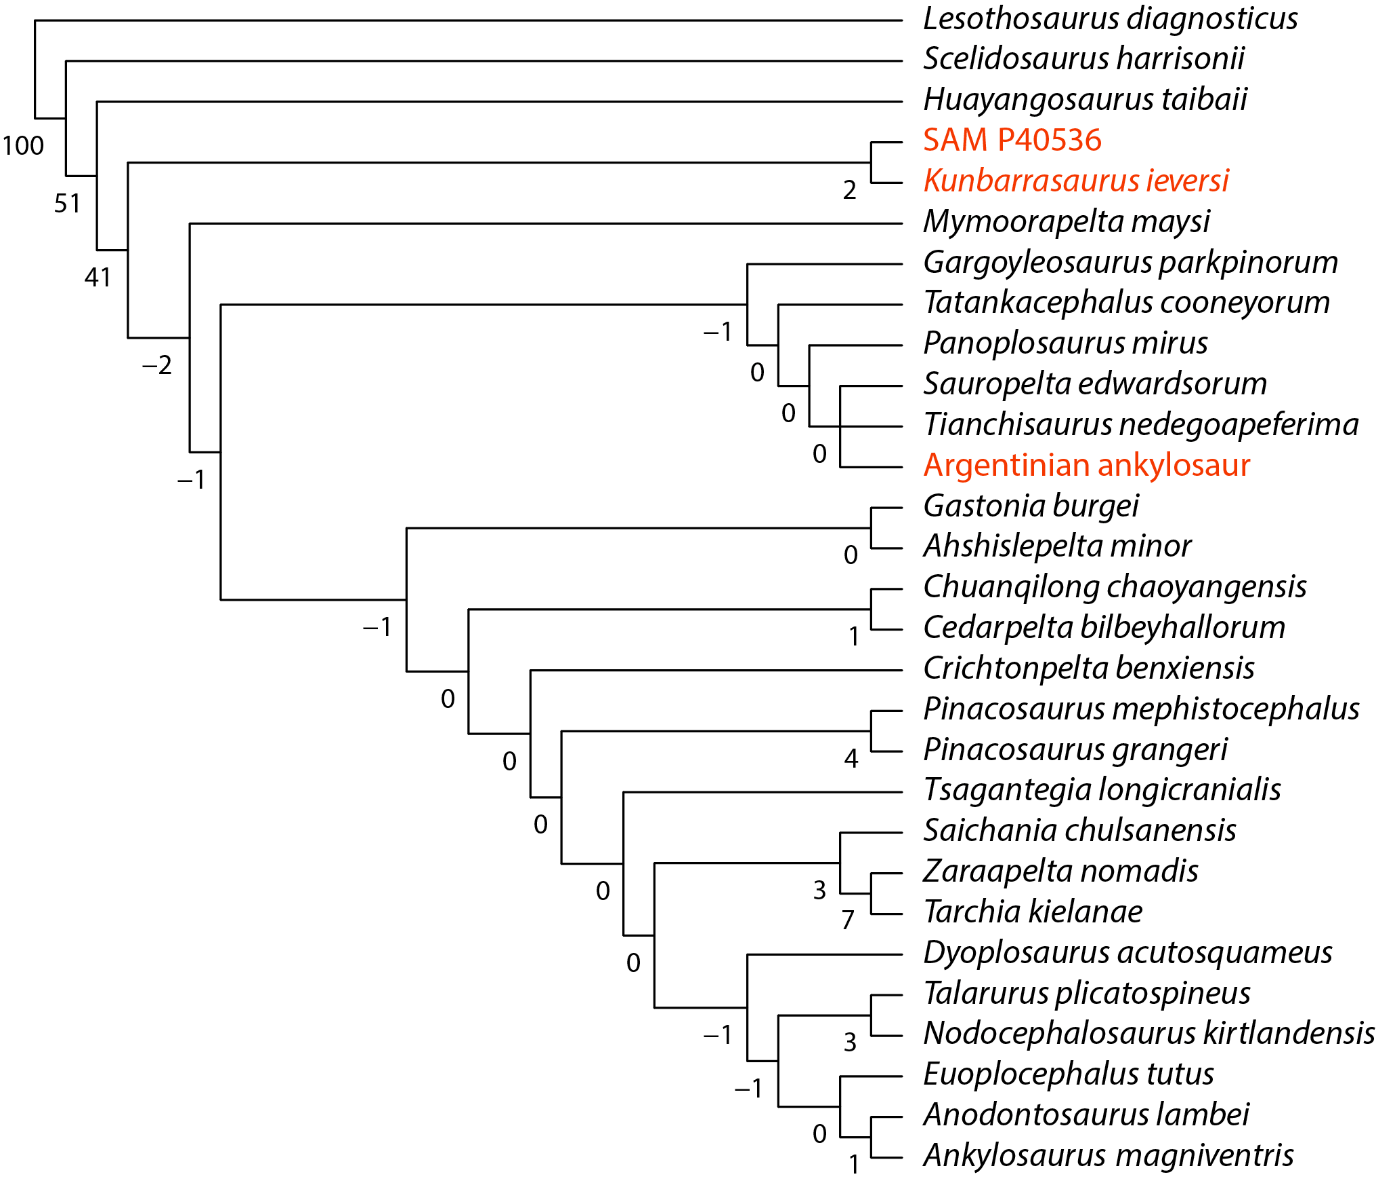


Supplementary Material S.3 Figure S2- Bootstrap values produced from Soto-Acuna (2021) matrix including SAMA P405346.


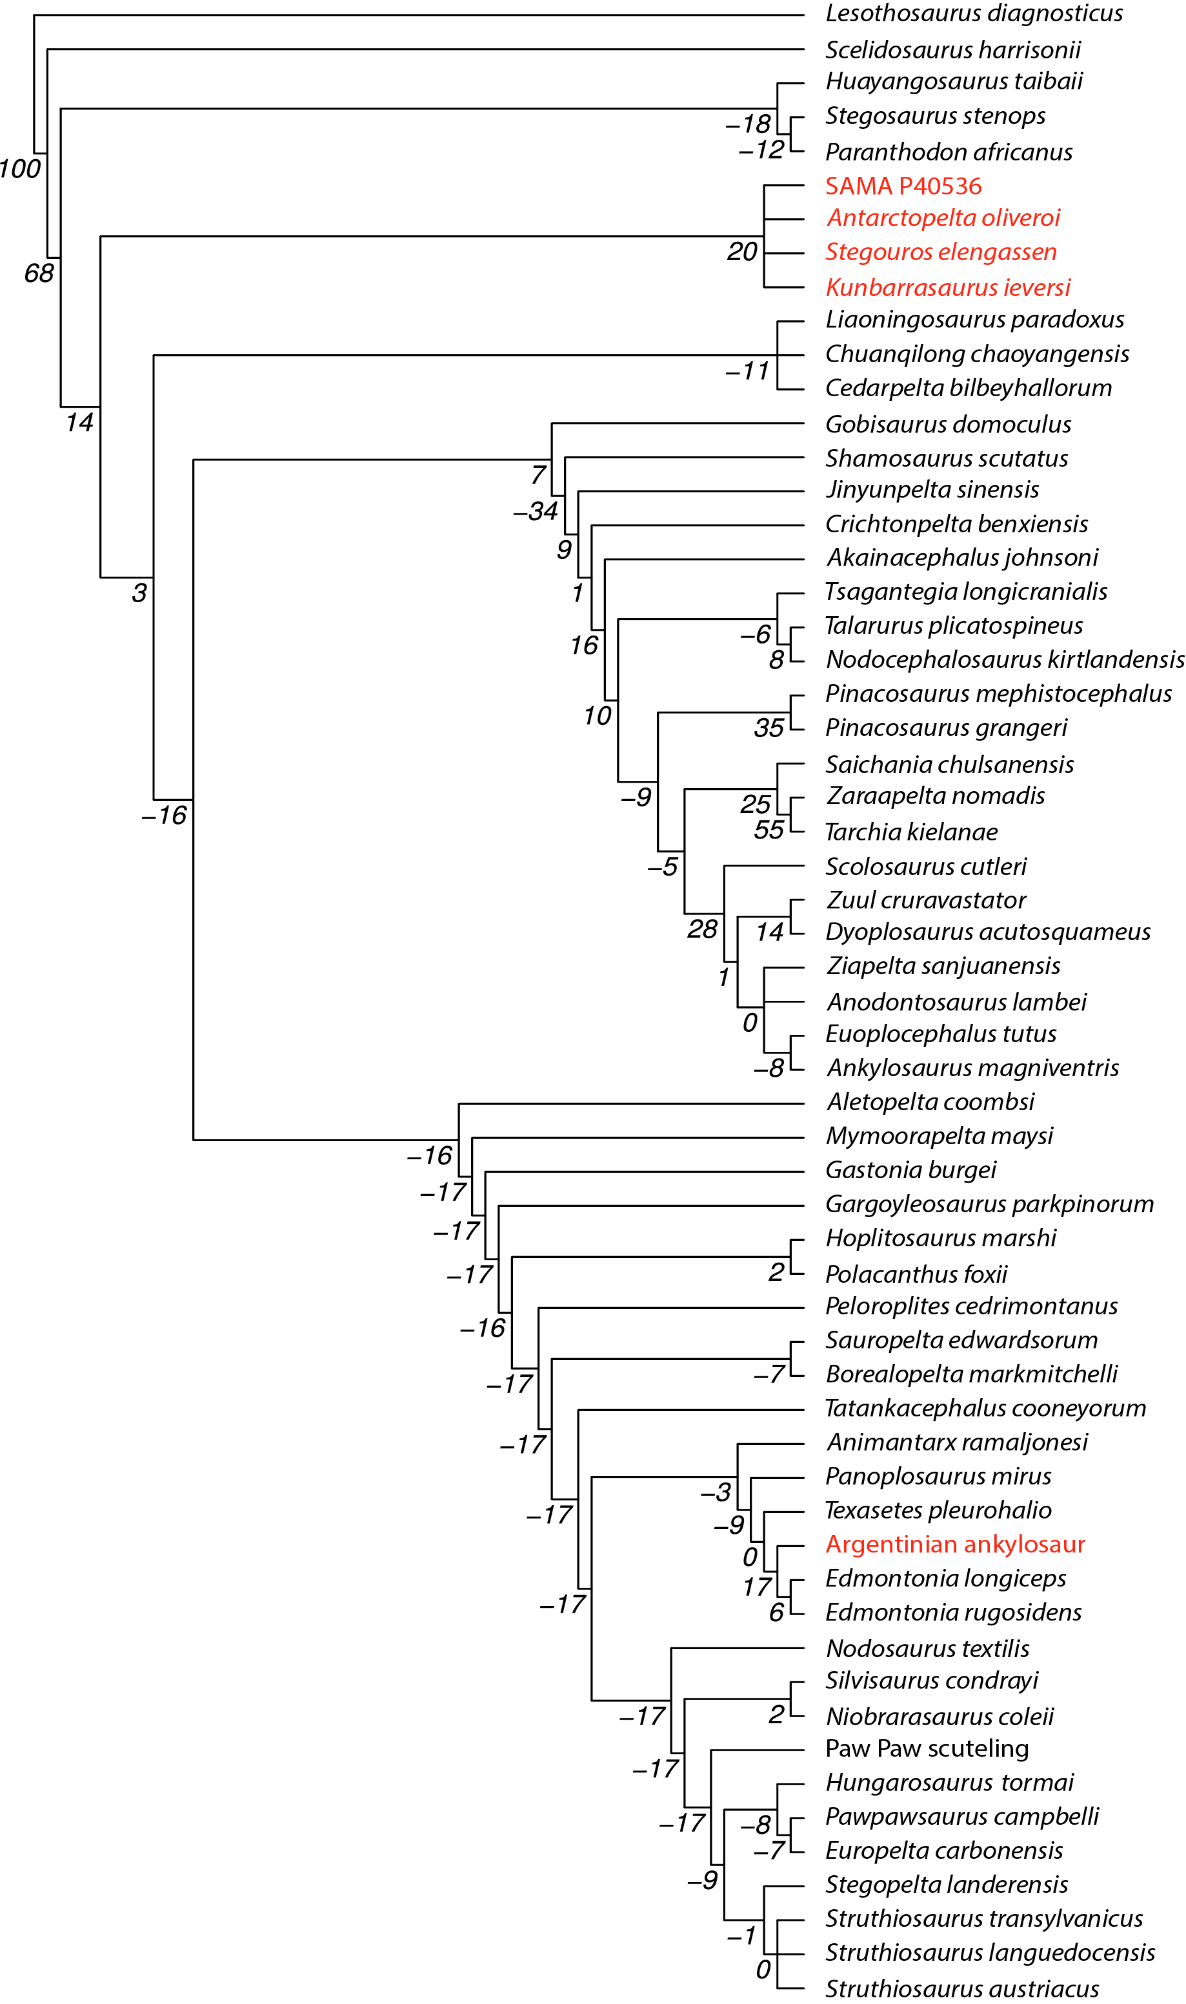


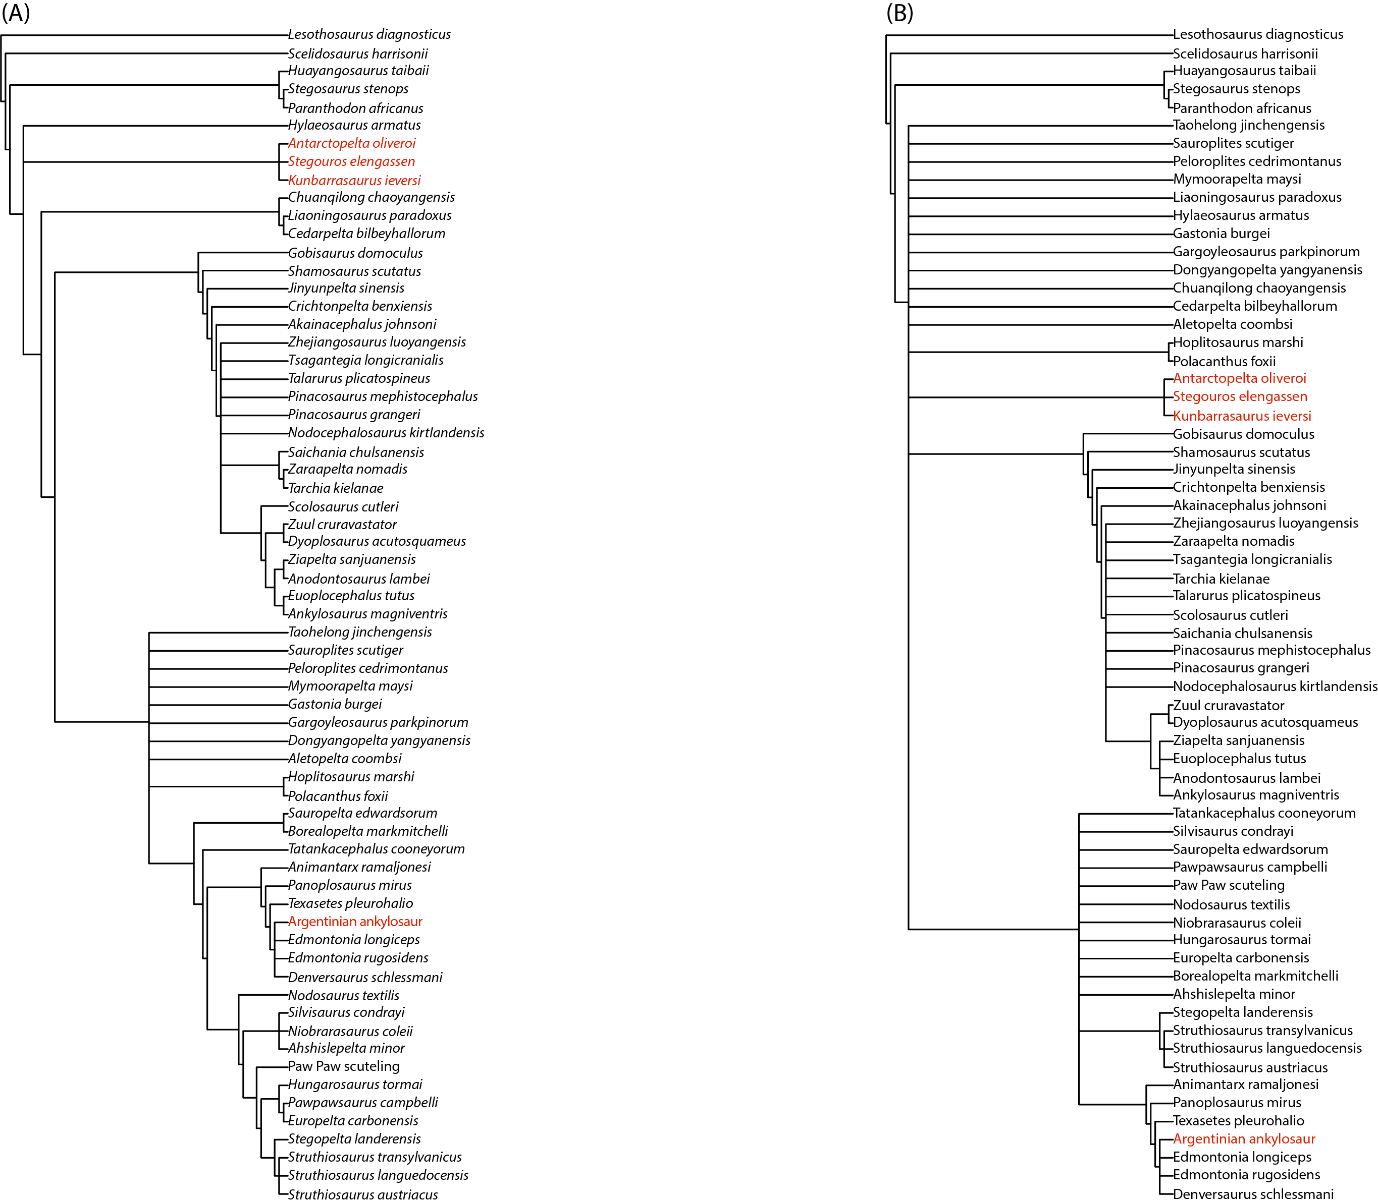
Supplementary Material S3, Figure S3- Strict consensus trees produced following the methodology of Soto-Acuna (2021), not including SAMA P405346. A) Strict consensus tree produced from 20 MPTs, B) strict consensus tree produced after performing another round of branch swapping on the original 20 MPTs.
